# Supplementary material
Source: PubMed Central journal article supplement (PMC1459412)
Supplement: nar_34_9_2495__1.pdf [file nar_34_9_2495__1.pdf]

## Supplementary data

Estimate of number of mRNA molecules per cell

The measured yield of total RNA from  $1 \times 10^8$  procytic cells is  $100 \mu\text{g}$

The recovery of polyadenylated RNA after oligo dT cellulose chromatography is 4 %. Thus,  $1 \times 10^8$  procytic cells contain up to  $4 \mu\text{g}$  of mRNA (the polyadenylated RNA is contaminated with ribosomal RNA)

An estimate for an average mRNA is 1500 nucleotides long

The average mRNA has a molecular weight of  $1500 \times 345$

The number of mRNA molecules cells is thus:

$$\frac{4 \times 10^{-6} \times 6 \times 10^{23}}{1500 \times 345 \times 10^8} = \frac{24 \times 10^9}{1500 \times 345} \sim 50\,000 \text{ molecules mRNA/procytic cell}$$
